# Supplementary material
Source: HighWire-hosted journal article supplement (https://heart.bmj.com/content/108/6/451)
Supplement: inline-supplementary-material-1 [file inline-supplementary-material-1.pdf]

Schnabel et al. – First detected AF

## Supplementary Material

### Refined Atrial Fibrillation Screening and Cost-effectiveness in the German Population

Renate B. Schnabel, MD, MSc; Christopher Wallenhorst, MSc; Daniel Engler, MSc; Stefan Blankenberg, MD; Norbert Pfeiffer, Matthias Büttner, Matthias Michal, Karl J. Lackner, Thomas Münzel, MD; Philipp S. Wild, MD, MSc; Carlos Martinez, MD, MSc; Ben Freedman MBBS, PhD for the Gutenberg Health Study investigators

University Heart and Vascular Center Hamburg Eppendorf, Hamburg, Germany (RBS, DE, SB); German Center for Cardiovascular Research (DZHK) partner site Hamburg/Kiel/Lübeck (RBS, DE, SB); Department of Ophthalmology, University Medical Center of the Johannes Gutenberg-University Mainz, Mainz, Germany (NP); Institute of Medical Biostatistics, Epidemiology and Informatics (IMBEI), University Medical Center, Johannes Gutenberg University, Mainz, Germany (MB); Department of Psychosomatic Medicine and Psychotherapy, University Medical Center of the Johannes Gutenberg University Mainz, Mainz, Germany (MM); Institute of Clinical Chemistry and Laboratory Medicine, University Medical Center of the Johannes Gutenberg University Mainz, Mainz, Germany (KJL); Preventive Cardiology and Preventive Medicine, Department of Cardiology, University Medical Center Mainz, Germany (PSW); Center for Thrombosis and Hemostasis, University Medical Center Mainz, Germany (PSW); German Center for Cardiovascular Research (DZHK) partner site Rhein/Main (PSW, TM); Department of Cardiology – Cardiology I, University Medical Center Mainz, Germany (TM); Institute for Epidemiology, Statistics and Informatics GmbH, Frankfurt, Germany (CW, CM); Heart Research Institute, Charles Perkins Centre, and Concord Hospital Dept of Cardiology Concord Clinical School, University of Sydney, Sydney, New South Wales, Australia (BF).

Schnabel et al. – First detected AF

## Supplementary Methods

### Study participants

#### *Response rate*

The response rate was 62%.

#### *Covariates*

For the current analyses, 121 clinical and biomarker variables from the GHS were available. We also defined smoking status (never smokers and former smokers versus current smokers). The diagnosis of diabetes mellitus was based on a physician diagnosis of diabetes and/or a study fasting blood glucose concentration of  $\geq 126$ mg/dL (minimum 8-hour fast) or a blood glucose level of  $\geq 200$ mg/dL. Dyslipidemia was defined as a physician's diagnosis and/or an LDL/HDL ratio of  $>3.5$  measured in the study. Hypertension comprised anti-hypertensive drug treatment and/or a mean systolic blood pressure of  $\geq 140$ mmHg and/or a mean diastolic blood pressure of  $\geq 90$ mmHg measured on site. All individuals underwent a multi-modal echocardiography with an iE33 echocardiography system with a S5-1 sector array transducer (Royal Philips Electronics, Amsterdam, The Netherlands). Examinations were performed using a standardized protocol by trained and certified medical technical assistants at a single centre. C-reactive protein, N-terminal pro B-type natriuretic peptide (Nt-proBNP) were measured by routine methods.[1] Cardiac symptoms, a history of myocardial infarction and stroke were self-reported. Heart failure was defined clinically (New York Heart Association classification, heart failure medication) and by echocardiographic left ventricular ejection fraction  $<55\%$ . A left ventricular mass index of  $>95$ g/m<sup>2</sup> in woman and  $>115$ g/m<sup>2</sup> in men was defined as left ventricular hypertrophy assessed by echocardiography.

### Statistical methods

The prevalence data was weighted for sex 1:1, place of residence 1:1 (urban and rural areas) and equal parts for the four age decades of the population in Mainz and Mainz-Bingen area (December 31, 2008).[2] Mean values and standard deviations were presented for symmetric continuous

## Schnabel et al. – First detected AF

variables, median and 25<sup>th</sup>/75<sup>th</sup> percentiles for skewed continuous variables, and proportions and 95% confidence intervals for categorical variables.

For the estimation of heart failure risk and risk of stroke or death, respective risk algorithms from the literature were applied.[3, 4] Heart failure risk scores were truncated at the upper risk estimate of  $\geq 45\%$  to avoid inaccuracies due to extreme observations.

*Imputation*

We imputed missing values in predictor data using proximity as outlined in.[5-7] The proximities give an intrinsic measure of similarities between the individuals/data. For continuous predictors, the imputed value is the weighted average of the non-missing observations, where the weights are the proximities. For categorical predictors, the imputed value is the category with the largest average proximity.

**Cost-effectiveness analyses**

The prevalence of unknown AF was taken from GHS. The proportion of persistent OAC users in AF,[8] incidence rates for stroke, all-cause mortality and major bleeding were retrieved from published data.[9] Costs for the screening included an invitation letter to the German population aged 65-74 and a subsequent general practitioner (GP) visit with a 12 lead ECG in 62% of individuals based on the response rate as seen in GHS. Furthermore, the cost-effectiveness analysis accounted for lifetime costs for a first stroke, costs for major bleeding events and annual treatment costs for vitamin K antagonists (VKAs) and non-vitamin K oral anticoagulants (NOACs). Costs included GP visits, blood work (INR tests and creatinine measurement) and drug prescriptions.[10] Details on input data (including their sources) and assumptions of the analyses are provided below. The target variables of the cost-effectiveness analyses were costs per quality-adjusted life-year (QALY) gained and costs per stroke prevented.

## Schnabel et al. – First detected AF

Sensitivity analyses were performed for the prevalence of undetected AF, the proportion of OAC uptake, and the proportion of NOAC prescription in anticoagulant users.

In addition, refined screening scenarios (other than age cut-off (65 years) alone) were assessed by using an age cut-off plus clinical AF risk score based threshold of 5% and 10%, and age cut-off plus a point of care testing of Nt-proBNP to pre-select individuals at higher risk of AF before performing a 12-lead ECG. We used Nt-proBNP measurements in all participants without known AF and examined different cut-offs. Additional assumptions were the costs for a point-of-care test for Nt-proBNP of 10 EUR and a 100 percent participation rate in the 12-lead ECG after positive Nt-proBNP testing.

**Input data for cost-effectiveness model****AF prevalence**

1. Prevalence of known AF stratified by age and gender.[11]
2. Prevalence of unknown AF stratified by age based on new AF in GHS. Different scenarios investigated in sensitivity analysis.

**Outcomes after AF**

Incidence of stroke, major bleeds and mortality following AF (treated vs. untreated AF) stratified by time since AF, age and gender.[12] Estimates for treated AF are based on VKA only, i.e. not considering NOACs.

**Proportion of OAC treated AF**

1. Prevalence of OAC treatment in patients with known AF stratified by NOAC/VKA.[13] Different scenarios investigated in sensitivity analysis.
2. VKA to NOAC ratio assumed to be 1:1 in the base analysis. Different scenarios investigated in sensitivity analysis.

**Population data**

Population of Mainz and Mainz-Bingen area stratified by residence, age and sex from 12/2008.[14]

**Economic transformations**

1. Prices converted to 04/2018 numbers based on (SEA-VPI-Nr. 06 - "Gesundheitspflege").[15]
2. Discount rate: 5%.

**Screening approach**

- Step 1: Invitation letter to be sent to all Germans aged 65-74
- Step 2: 12 lead ECG to be performed at GP assuming a participation rate of 62% based on the response rate as seen in Gutenberg Health Study and a sensitivity and specificity of the Gutenberg Health Study in clinic ECG (100% and 98%, respectively)

**QALYs**

1. QALYs lost after ischaemic stroke.[16]

## Schnabel et al. – First detected AF

2. QALYs lost due to major bleeding.[17]
3. QALYs lost due to VKA treatment.[17] Same QALY loss for VKA and NOAC used.

**Costs****Input data:**

1. Lifetime costs for a first ischaemic stroke[18]<sup>1</sup>
2. Costs for a major bleeding requiring hospitalisation<sup>2</sup>
3. Costs for OAC treatment
  - a. VKA
    - i. Phenprocoumon [19]
    - ii. INR tests[20]
    - iii. Quartalspauschale [20]
    - iv. Kidney function control[20]
  - b. NOACs[21]
    - i. Apixaban, Edoxaban, Rivaroxaban, Dabigatran[21]
    - ii. Quartalspauschale [20]
    - iii. Kidney function control [20]
4. Costs for screening
  - a. Invitation letter[22]
  - b. GP visit including 12 lead ECG [20]

**Note:**

1. Inpatient costs in the first year after stroke in Kolominsky-Rabas replaced with costs for initial stroke hospitalisation in Hamburg 2016
2. Average cost of hospital treatment for bleeding
3. The following assumptions were made:
  - a. Dose 4mg/day, INR test every 2 weeks (Ziffer 32026 "Thromboplastinzeit"), 4x Quartalspauschale (55-74), 1x Kidney function control including optional blood work
  - b. NOAC medication costs based on mean costs for the 4 NOAC products, 1x Quartalspauschale (55-74), 1x Kidney function control including optional blood work
4. The following assumptions were made:
  - a. -
  - b. Quartalspauschale (55-74)

---

<sup>1</sup> Cost of hospital treatment for Stroke on average in 2016 University Clinic Hamburg = 5.483,82 € per admission (Inpatient Costs) The average cost of hospital treatment for Stroke was provided by the UKE central controlling division for 2016 based on the DRG-System for the ICD Code I63.-

<sup>2</sup> Cost of hospital treatment for Bleeding/Hemorrhage on average in 2016 University Clinic Hamburg = 12.012,01 € per admission The average cost was provided by the UKE central controlling division for 2016 based on the DRG-System for the ICD Code ICD Code I61; K92.0 – K92.2; K28.0-K28.2; K25.0-K25.2 (all combined in average)

Schnabel et al. – First detected AF

**Supplementary Table 1.** Cardiac medication in the total sample by AF status, weighted for age and sex of the population in Mainz and in Mainz-Bingen Area (n=14,937).

|                                                                    | No AF<br>n=14,557 | Known AF<br>n=355 | New AF<br>n=25 |
|--------------------------------------------------------------------|-------------------|-------------------|----------------|
| <b>Antithrombotic Therapy</b>                                      |                   |                   |                |
| Heparin, (%)                                                       | 0.1               | 1.2               | 0              |
| Oral anticoagulants, (%)                                           | 0.7               | 35.3              | 0              |
| Antiplatelet agents, (%)                                           | 7.4               | 29.1              | 26.9           |
| <b>Antiarrhythmics</b>                                             |                   |                   |                |
| Class I, (%)                                                       | 0.0               | 5.0               | 0              |
| Class III, (%)                                                     | 0.1               | 8.4               | 0              |
| Class IV, (%)                                                      | 0.6               | 5.7               | 3.7            |
| Digitalis, (%)                                                     | 0.2               | 13.7              | 0              |
| Beta blockers, (%)                                                 | 13.4              | 59.2              | 40.3           |
| <b>Other medication</b>                                            |                   |                   |                |
| ACE-inhibitors, AT II antagonists,<br>direct renin-inhibitors, (%) | 19.9              | 54.3              | 45.9           |
| Statins (%)                                                        | 9.6               | 33.0              | 25.8           |
| Insulin, (%)                                                       | 1.7               | 4.8               | 13.5           |
| Oral antidiabetics, (%)                                            | 3.8               | 8.7               | 10.2           |
| Thyroid hormone therapy, (%)                                       | 11.6              | 16.1              | 6.9            |

Provided are the number and percent of individuals.

Schnabel et al. – First detected AF

**Supplementary Table 2.** Median 5-year predicted risk of atrial fibrillation applying a recent risk prediction algorithm[23] in individuals by AF status distributed by age decades .

|                                  | Age decades in years | Risk Score      |
|----------------------------------|----------------------|-----------------|
| <b>No atrial fibrillation</b>    | 35-44                | 0.2 (0.1/0.3)   |
|                                  | 45-54                | 0.6 (0.4/0.9)   |
|                                  | 55-64                | 1.7 (1.1/2.6)   |
|                                  | 65-74                | 5.2 (3.5/8.1)   |
| <b>Known atrial fibrillation</b> | 35-44                | 0.4 (0.2/0.8)   |
|                                  | 45-54                | 0.9 (0.6/2.1)   |
|                                  | 55-64                | 3.0 (1.9/5.1)   |
|                                  | 65-74                | 8.6 (5.4/13.4)  |
| <b>New atrial fibrillation</b>   | 35-44                | 0.2             |
|                                  | 45-54                | 1.5 (0.9/3.3)   |
|                                  | 55-64                | 2.7 (1.8/4.0)   |
|                                  | 65-74                | 10.0 (7.0/13.8) |

Provided are the median and 25<sup>th</sup>/75<sup>th</sup> percentiles. Data are weighted for residence, age and sex of the population in Mainz and in Mainz-Bingen area.

Schnabel et al. – First detected AF

**Supplementary Table 3.** Number needed to screen for different Nt-proBNP cut-offs.

| %ile | Nt-proBNP, ng/L | Number needed to screen | Sensitivity | Specificity | Sum  | Weighted Sum |
|------|-----------------|-------------------------|-------------|-------------|------|--------------|
| 70   | 97.5            | 15.74                   | 0.73        | 0.71        | 1.44 | 1.59         |
| 71   | 100.3           | 15.22                   | 0.73        | 0.72        | 1.45 | 1.59         |
| 72   | 103.5           | 14.84                   | 0.72        | 0.73        | 1.45 | 1.59         |
| 73   | 106.4           | 14.48                   | 0.71        | 0.74        | 1.45 | 1.59         |
| 74   | 109.7           | 14.02                   | 0.7         | 0.75        | 1.46 | 1.6          |
| 75   | 113.1           | 13.55                   | 0.7         | 0.76        | 1.46 | 1.6          |
| 76   | 116.6           | 13.08                   | 0.69        | 0.77        | 1.46 | 1.6          |
| 77   | 120.3           | 12.6                    | 0.68        | 0.78        | 1.47 | 1.6          |
| 78   | 124.5           | 12.17                   | 0.67        | 0.79        | 1.47 | 1.6          |
| 79   | 129             | 11.84                   | 0.66        | 0.8         | 1.47 | 1.6          |
| 80   | 133.3           | 11.38                   | 0.65        | 0.81        | 1.47 | 1.6          |
| 81   | 139.12          | 10.92                   | 0.64        | 0.82        | 1.47 | 1.6          |
| 82   | 144.3           | 10.44                   | 0.64        | 0.83        | 1.47 | 1.6          |
| 83   | 149.9           | 10.05                   | 0.62        | 0.84        | 1.47 | 1.59         |
| 84   | 156.7           | 9.54                    | 0.61        | 0.85        | 1.47 | 1.59         |
| 85   | 163.1           | 9.1                     | 0.6         | 0.86        | 1.47 | 1.59         |
| 86   | 170.8           | 8.73                    | 0.58        | 0.87        | 1.46 | 1.57         |
| 87   | 178.6           | 8.38                    | 0.56        | 0.88        | 1.45 | 1.56         |
| 88   | 188.1           | 7.79                    | 0.56        | 0.89        | 1.45 | 1.56         |
| 89   | 199.7           | 7.18                    | 0.55        | 0.9         | 1.45 | 1.56         |
| 90   | 211.0           | 6.73                    | 0.53        | 0.91        | 1.44 | 1.55         |
| 91   | 227.7           | 6.15                    | 0.52        | 0.92        | 1.44 | 1.55         |
| 92   | 243.7           | 5.56                    | 0.51        | 0.93        | 1.44 | 1.54         |
| 93   | 263.3           | 5.13                    | 0.48        | 0.94        | 1.42 | 1.52         |
| 94   | 287.1           | 4.55                    | 0.46        | 0.95        | 1.41 | 1.5          |
| 95   | 326.5           | 3.93                    | 0.44        | 0.96        | 1.4  | 1.49         |

Provided are the percentile and respective Nt-proBNP concentrations.



Schnabel et al. – First detected AF

**Supplementary Table 4.** Number of strokes avoided and costs per QALY gained by AF test based on Nt-proBNP

| Quantile                     | Threshold <sup>1</sup><br>[ng/L] | Sensitivity | Specificity | New AF | Strokes<br>avoided | Costs per stroke<br>avoided [€] | Costs per QALY<br>gained [€] |
|------------------------------|----------------------------------|-------------|-------------|--------|--------------------|---------------------------------|------------------------------|
| ECG only <sup>2</sup>        | NA                               | 1.00        | 0.98        | 25733  | 1122               | 117,498                         | 30,361                       |
| <b>Nt-proBNP<sup>3</sup></b> |                                  |             |             |        |                    |                                 |                              |
| 0.15                         | 19.85                            | 0.94        | 0.15        | 24189  | 1054               | 157,755                         | 40,763                       |
| 0.16                         | 20.97                            | 0.94        | 0.16        | 24189  | 1054               | 156,991                         | 40,566                       |
| 0.17                         | 22.03                            | 0.94        | 0.17        | 24189  | 1054               | 156,227                         | 40,368                       |
| 0.18                         | 23.08                            | 0.94        | 0.18        | 24189  | 1054               | 155,463                         | 40,171                       |
| 0.19                         | 23.97                            | 0.93        | 0.19        | 23932  | 1043               | 156,061                         | 40,325                       |
| 0.20                         | 25.06                            | 0.93        | 0.20        | 23932  | 1043               | 155,289                         | 40,126                       |
| 0.21                         | 25.87                            | 0.92        | 0.21        | 23675  | 1032               | 155,890                         | 40,281                       |
| 0.22                         | 26.98                            | 0.92        | 0.22        | 23675  | 1032               | 155,110                         | 40,080                       |
| 0.23                         | 28.00                            | 0.92        | 0.23        | 23675  | 1032               | 154,329                         | 39,878                       |
| 0.24                         | 29.07                            | 0.91        | 0.24        | 23417  | 1021               | 154,927                         | 40,033                       |
| 0.25                         | 30.11                            | 0.91        | 0.26        | 23417  | 1021               | 153,349                         | 39,625                       |
| 0.26                         | 31.24                            | 0.91        | 0.27        | 23417  | 1021               | 152,560                         | 39,421                       |
| 0.27                         | 32.19                            | 0.91        | 0.28        | 23417  | 1021               | 151,771                         | 39,217                       |
| 0.28                         | 33.15                            | 0.91        | 0.29        | 23417  | 1021               | 150,982                         | 39,013                       |
| 0.29                         | 34.21                            | 0.91        | 0.30        | 23417  | 1021               | 150,193                         | 38,809                       |
| 0.30                         | 35.44                            | 0.90        | 0.31        | 23160  | 1009               | 150,751                         | 38,954                       |
| 0.31                         | 36.56                            | 0.90        | 0.32        | 23160  | 1009               | 149,953                         | 38,747                       |
| 0.32                         | 37.51                            | 0.90        | 0.33        | 23160  | 1009               | 149,155                         | 38,541                       |
| 0.33                         | 38.60                            | 0.90        | 0.34        | 23160  | 1009               | 148,358                         | 38,335                       |
| 0.34                         | 39.66                            | 0.89        | 0.35        | 22903  | 998                | 148,902                         | 38,476                       |
| 0.35                         | 40.81                            | 0.88        | 0.36        | 22645  | 987                | 149,459                         | 38,620                       |
| 0.36                         | 41.85                            | 0.88        | 0.37        | 22645  | 987                | 148,643                         | 38,409                       |

## Schnabel et al. – First detected AF

| Quantile | Threshold <sup>1</sup><br>[ng/L] | Sensitivity | Specificity | New AF | Stokes<br>avoided | Costs per stroke<br>avoided [€] | Costs per QALY<br>gained [€] |
|----------|----------------------------------|-------------|-------------|--------|-------------------|---------------------------------|------------------------------|
| 0.37     | 42.98                            | 0.88        | 0.38        | 22645  | 987               | 147,827                         | 38,198                       |
| 0.38     | 44.09                            | 0.88        | 0.39        | 22645  | 987               | 147,011                         | 37,987                       |
| 0.39     | 45.28                            | 0.88        | 0.40        | 22645  | 987               | 146,195                         | 37,776                       |
| 0.40     | 46.59                            | 0.88        | 0.41        | 22645  | 987               | 145,379                         | 37,565                       |
| 0.41     | 47.61                            | 0.87        | 0.42        | 22388  | 976               | 145,901                         | 37,700                       |
| 0.42     | 48.97                            | 0.86        | 0.43        | 22131  | 965               | 146,436                         | 37,838                       |
| 0.43     | 50.31                            | 0.85        | 0.44        | 21873  | 953               | 146,983                         | 37,980                       |
| 0.44     | 51.49                            | 0.85        | 0.45        | 21873  | 953               | 146,139                         | 37,762                       |
| 0.45     | 52.84                            | 0.85        | 0.46        | 21873  | 953               | 145,294                         | 37,543                       |
| 0.46     | 54.07                            | 0.84        | 0.47        | 21616  | 942               | 145,834                         | 37,683                       |
| 0.47     | 55.61                            | 0.83        | 0.48        | 21359  | 931               | 146,387                         | 37,826                       |
| 0.48     | 57.12                            | 0.83        | 0.49        | 21359  | 931               | 145,522                         | 37,602                       |
| 0.49     | 58.43                            | 0.83        | 0.50        | 21359  | 931               | 144,657                         | 37,379                       |
| 0.50     | 59.92                            | 0.82        | 0.51        | 21101  | 920               | 145,203                         | 37,520                       |
| 0.51     | 61.28                            | 0.82        | 0.52        | 21101  | 920               | 144,327                         | 37,294                       |
| 0.52     | 62.50                            | 0.82        | 0.53        | 21101  | 920               | 143,451                         | 37,067                       |
| 0.53     | 63.81                            | 0.81        | 0.54        | 20844  | 909               | 143,989                         | 37,206                       |
| 0.54     | 65.37                            | 0.81        | 0.55        | 20844  | 909               | 143,102                         | 36,977                       |
| 0.55     | 67.24                            | 0.81        | 0.56        | 20844  | 909               | 142,216                         | 36,748                       |
| 0.56     | 68.96                            | 0.80        | 0.57        | 20587  | 897               | 142,745                         | 36,885                       |
| 0.57     | 70.70                            | 0.79        | 0.58        | 20329  | 886               | 143,287                         | 37,025                       |
| 0.58     | 72.44                            | 0.79        | 0.59        | 20329  | 886               | 142,378                         | 36,790                       |
| 0.59     | 74.48                            | 0.79        | 0.60        | 20329  | 886               | 141,469                         | 36,555                       |
| 0.60     | 76.29                            | 0.78        | 0.61        | 20072  | 875               | 142,002                         | 36,693                       |
| 0.61     | 78.15                            | 0.78        | 0.62        | 20072  | 875               | 141,081                         | 36,455                       |
| 0.62     | 79.96                            | 0.78        | 0.63        | 20072  | 875               | 140,160                         | 36,217                       |

## Schnabel et al. – First detected AF

| Quantile | Threshold <sup>1</sup><br>[ng/L] | Sensitivity | Specificity | New AF | Stokes<br>avoided | Costs per stroke<br>avoided [€] | Costs per QALY<br>gained [€] |
|----------|----------------------------------|-------------|-------------|--------|-------------------|---------------------------------|------------------------------|
| 0.63     | 82.18                            | 0.78        | 0.64        | 20072  | 875               | 139,240                         | 35,979                       |
| 0.64     | 84.24                            | 0.77        | 0.65        | 19815  | 864               | 139,751                         | 36,111                       |
| 0.65     | 86.05                            | 0.77        | 0.66        | 19815  | 864               | 138,818                         | 35,870                       |
| 0.66     | 88.21                            | 0.76        | 0.67        | 19557  | 852               | 139,330                         | 36,002                       |
| 0.67     | 90.50                            | 0.75        | 0.68        | 19300  | 841               | 139,856                         | 36,138                       |
| 0.68     | 92.54                            | 0.75        | 0.69        | 19300  | 841               | 138,898                         | 35,891                       |
| 0.69     | 94.95                            | 0.74        | 0.70        | 19043  | 830               | 139,425                         | 36,027                       |
| 0.70     | 97.46                            | 0.73        | 0.71        | 18785  | 819               | 139,966                         | 36,167                       |
| 0.71     | 100.30                           | 0.73        | 0.72        | 18785  | 819               | 138,983                         | 35,913                       |
| 0.72     | 103.50                           | 0.72        | 0.73        | 18528  | 808               | 139,525                         | 36,053                       |
| 0.73     | 106.50                           | 0.71        | 0.74        | 18271  | 796               | 140,084                         | 36,197                       |
| 0.74     | 109.80                           | 0.70        | 0.75        | 18013  | 785               | 140,657                         | 36,345                       |
| 0.75     | 113.10                           | 0.70        | 0.76        | 18013  | 785               | 139,632                         | 36,080                       |
| 0.76     | 116.60                           | 0.69        | 0.77        | 17756  | 774               | 140,207                         | 36,229                       |
| 0.77     | 120.40                           | 0.68        | 0.78        | 17499  | 763               | 140,800                         | 36,382                       |
| 0.78     | 124.60                           | 0.67        | 0.79        | 17241  | 751               | 141,410                         | 36,540                       |
| 0.79     | 129.10                           | 0.66        | 0.80        | 16984  | 740               | 142,039                         | 36,702                       |
| 0.80     | 133.40                           | 0.65        | 0.81        | 16727  | 729               | 142,687                         | 36,870                       |
| 0.81     | 139.20                           | 0.64        | 0.82        | 16469  | 718               | 143,356                         | 37,043                       |
| 0.82     | 144.40                           | 0.64        | 0.83        | 16469  | 718               | 142,234                         | 36,753                       |
| 0.83     | 150.00                           | 0.62        | 0.84        | 15955  | 695               | 144,758                         | 37,405                       |
| 0.84     | 156.67                           | 0.61        | 0.85        | 15697  | 684               | 145,493                         | 37,595                       |
| 0.85     | 163.10                           | 0.60        | 0.86        | 15440  | 673               | 146,253                         | 37,791                       |
| 0.86     | 170.80                           | 0.58        | 0.87        | 14925  | 651               | 149,089                         | 38,524                       |
| 0.87     | 178.60                           | 0.56        | 0.88        | 14411  | 628               | 152,128                         | 39,309                       |
| 0.88     | 188.10                           | 0.56        | 0.89        | 14411  | 628               | 150,846                         | 38,978                       |

## Schnabel et al. – First detected AF

| Quantile | Threshold <sup>1</sup><br>[ng/L] | Sensitivity | Specificity | New AF | Strokes<br>avoided | Costs per stroke<br>avoided [€] | Costs per QALY<br>gained [€] |
|----------|----------------------------------|-------------|-------------|--------|--------------------|---------------------------------|------------------------------|
| 0.89     | 199.66                           | 0.55        | 0.90        | 14153  | 617                | 151,772                         | 39,217                       |
| 0.90     | 211.00                           | 0.53        | 0.91        | 13639  | 594                | 155,084                         | 40,073                       |
| 0.91     | 227.66                           | 0.52        | 0.92        | 13381  | 583                | 156,145                         | 40,347                       |
| 0.92     | 243.70                           | 0.51        | 0.93        | 13124  | 572                | 157,248                         | 40,632                       |
| 0.93     | 263.30                           | 0.48        | 0.94        | 12352  | 538                | 163,824                         | 42,331                       |
| 0.94     | 287.05                           | 0.46        | 0.95        | 11837  | 516                | 168,164                         | 43,453                       |
| 0.95     | 326.54                           | 0.44        | 0.96        | 11323  | 494                | 172,899                         | 44,676                       |

A graphical representation of the results is provided in **Supplementary Figures 4 and 5**.

Abbreviations: AF, atrial fibrillation; NA, not applicable; Nt-proBNP, N-terminal pro B-type natriuretic peptide; QALY, quality-adjusted life year.

<sup>1</sup>: Positive AF test result if Nt-proBNP is above the given threshold.

<sup>2</sup>: Screening based on ECG only, i.e. without previous Nt-proBNP test.

<sup>3</sup>: Screening based on Nt-proBNP test and subsequent ECG in individuals with positive Nt-proBNP test.

Schnabel et al. – First detected AF

**Supplementary Figure 1.** Distribution of predicted 5-year risk of AF [23] among individuals with known and new AF. Data are weighted for residence, age and sex of the population in Mainz and in Mainz-Bingen area.

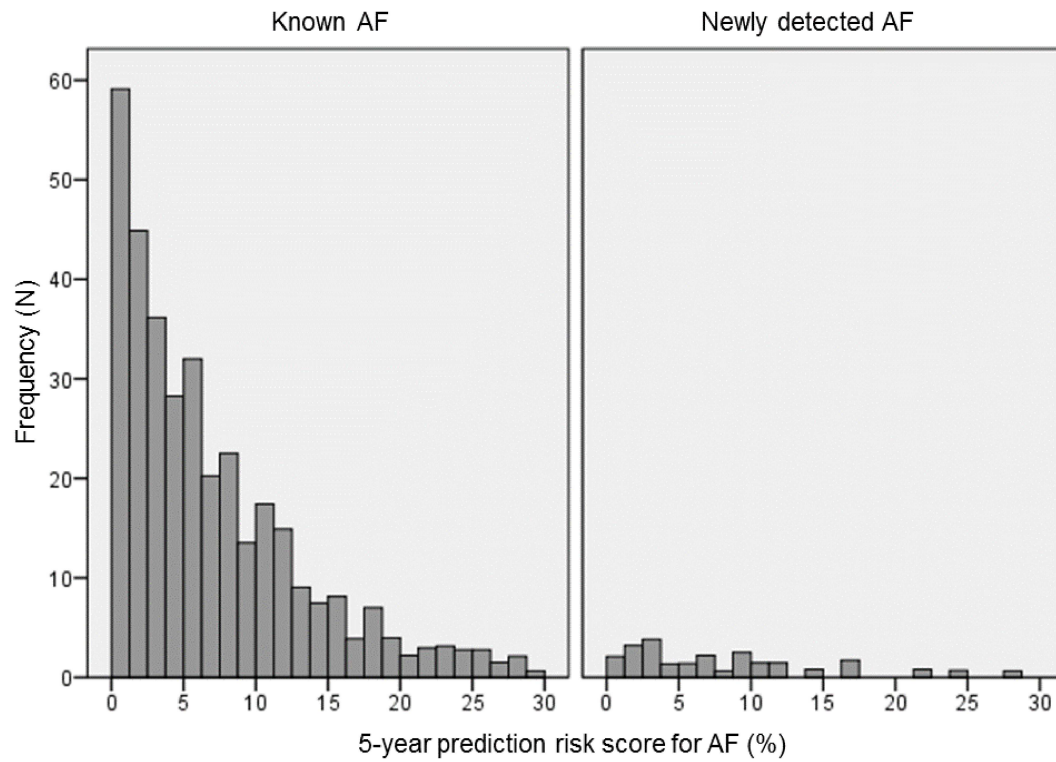

Schnabel et al. – First detected AF

**Supplementary Figure 2.** Annual stroke risk for individuals with new AF (n=25), adjusted for intake of warfarin.[24]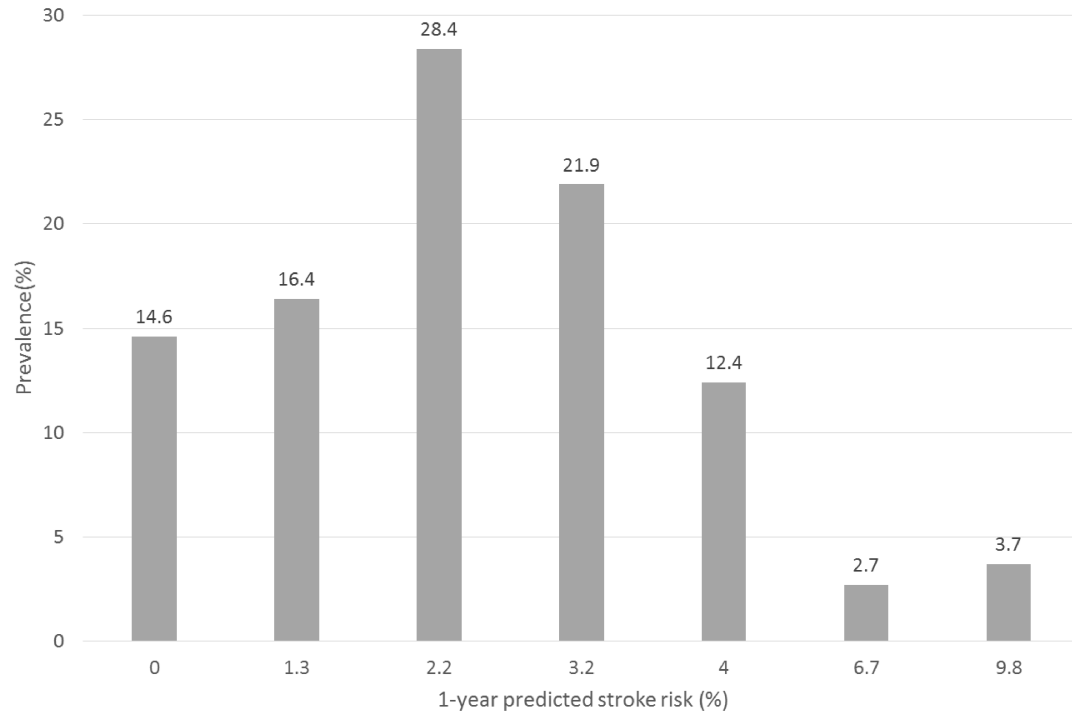

Schnabel et al. – First detected AF

**Supplementary Figure 3.** Random forest selection of variables by importance (N=15005).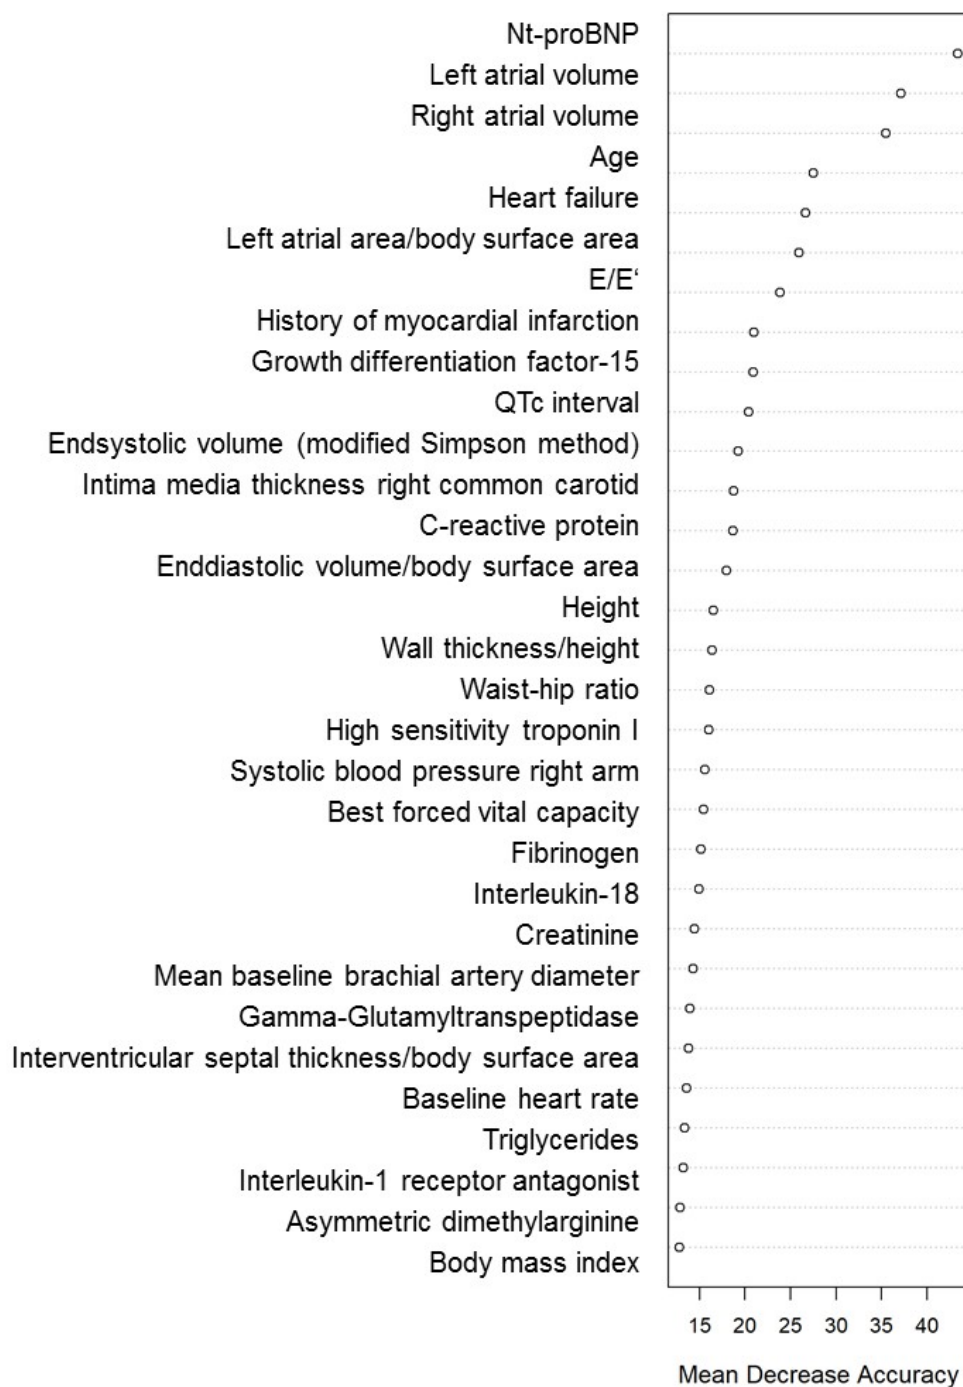

Schnabel et al. – First detected AF

**Supplementary Figure 4.** Sensitivity and specificity for Nt-proBNP across the upper percentiles of Nt-proBNP concentrations. Nt-proBNP stands for N-terminal pro B-type natriuretic peptide.

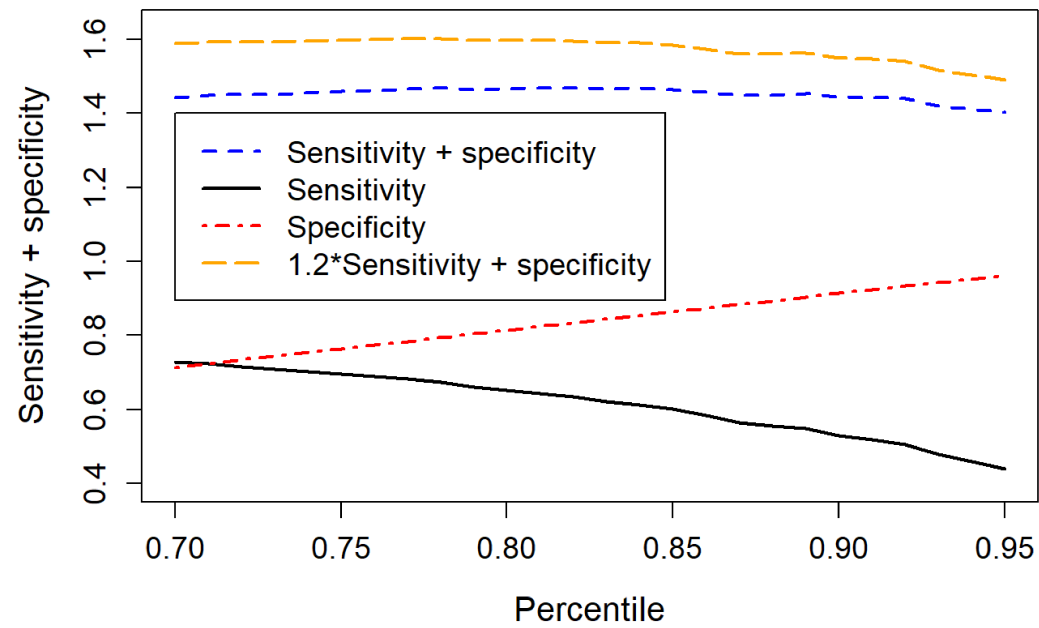



Schnabel et al. – First detected AF

**Supplementary Figure 5.** Number of strokes avoided by Nt-proBNP quantile.  
Nt-proBNP stands for N-terminal pro B-type natriuretic peptide.

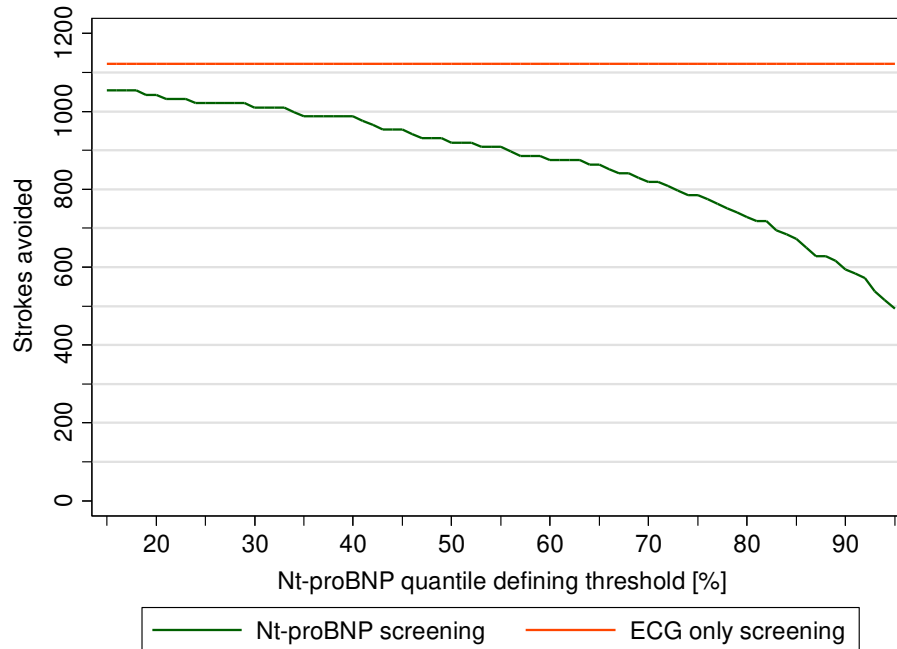

**Supplementary Figure 6.** Costs per QALY gained by Nt-proBNP quantile.

Nt-proBNP stands for N-terminal pro B-type natriuretic peptide; QALY for quality-adjusted life year.

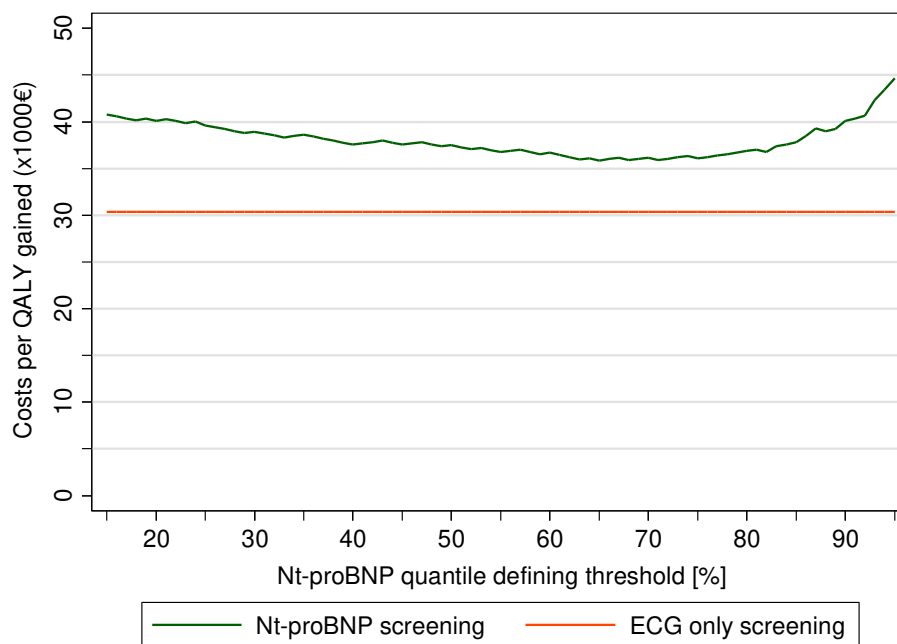

Schnabel et al. – First detected AF

**Supplementary Table 5.** Distribution of individuals with known AF (n=355) and new AF (n=25) by AF risk scoring weighted for residence, age and sex of the population in Mainz and in Mainz-Bingen Area (n=14,937).

| Atrial fibrillation status       | Risk Score <5% | Risk Score 5-10% | Risk Score >10% |
|----------------------------------|----------------|------------------|-----------------|
| Known atrial fibrillation, N (%) | 168 (7.7)      | 88 (0.6)         | 7 (0.0)         |
| New atrial fibrillation, N (%)   | 10 (3.2)       | 7 (0.6)          | 8 (0.1)         |

Distribution of individuals with known AF (n=344) and new AF (n=25) by Nt-proBNP threshold (120 ng/L) weighted for residence, age and sex of the population in Mainz and in Mainz-Bingen Area (n=14,103).

| Atrial fibrillation status       | Nt-proBNP <120% | Nt-proBNP >120% |
|----------------------------------|-----------------|-----------------|
| Known atrial fibrillation, N (%) | 120 (0.9)       | 224 (1.6)       |
| New atrial fibrillation, N (%)   | 4(0.0)          | 21 (0.1)        |

Mean values and standard deviations for continuous variables, median and 25th/75th percentiles for skewed continuous variables, or percent and a 95% confidence interval for categorical variables.

Nt-proBNP stands for N-terminal pro B-type natriuretic peptide. AF stands for atrial fibrillation

Schnabel et al. – First detected AF

## References:

1. Schnabel, R.B., et al., *Multiple biomarkers and atrial fibrillation in the general population*. 2014. **9**(11): p. e112486.
2. Wild, P., et al., *Die Gutenberg Gesundheitsstudie*. 2012. **55**(6-7): p. 824-830.
3. Alonso, A., et al., *Simple risk model predicts incidence of atrial fibrillation in a racially and geographically diverse population: the CHARGE-AF consortium*. 2013. **2**(2): p. e000102.
4. Wang, T.J., et al., *A risk score for predicting stroke or death in individuals with new-onset atrial fibrillation in the community: the Framingham Heart Study*. 2003. **290**(8): p. 1049-1056.
5. Breiman, L., *Random Forests*. Machine Learning, 2001. **45**(1): p. 5-32.
6. Breiman, L. and A. Cutler. *Random Forests: Missing values for the training set*. 2001 [cited Access: 18.05.2021; Available from: [https://www.stat.berkeley.edu/~breiman/RandomForests/cc\\_home.htm#missing1](https://www.stat.berkeley.edu/~breiman/RandomForests/cc_home.htm#missing1)].
7. Breiman, L. and A. Cutler, *Setting up, using, and understanding random forests V4*. O. J University of California, Department of Statistics, 2003.
8. Beyer-Westendorf, J., et al., *Real-world persistence and adherence to oral anticoagulation for stroke risk reduction in patients with atrial fibrillation*. 2016. **18**(8): p. 1150-1157.
9. Martinez, C., et al., *Adverse prognosis of incidentally detected ambulatory atrial fibrillation*. 2014. **112**(08): p. 276-286.
10. Kassenärztlichen Bundesvereinigung. *Einheitlichen Bewertungsmaßstab (EBM) 2018*. 2018 [cited 2018 29.May 2018]; Available from: <http://www.kbv.de/tools/ebm/>.
11. Wilke, T., et al., *Incidence and prevalence of atrial fibrillation: an analysis based on 8.3 million patients*. *Europace*, 2012. **15**(4): p. 486-493.
12. Martinez, C., A. Katholing, and S.B. Freedman, *Adverse prognosis of incidentally detected ambulatory atrial fibrillation*. *Thrombosis and haemostasis*, 2014. **112**(02): p. 276-286.
13. Beyer-Westendorf, J., B. Ehlken, and T. Evers, *Real-world persistence and adherence to oral anticoagulation for stroke risk reduction in patients with atrial fibrillation*. *Europace*, 2016. **18**(8): p. 1150-7.
14. Wild, P.S., et al., *Die Gutenberg Gesundheitsstudie*. *Bundesgesundheitsblatt - Gesundheitsforschung - Gesundheitsschutz*, 2012. **55**(6): p. 824-830.
15. Bundesamt, S. *Preise: Verbraucherpreisindizes für Deutschland. Monatsbericht April 2018*. 2018 29 May 2018; Available from: <https://www.destatis.de>.
16. Cadilhac, D.A., et al., *The health loss from ischemic stroke and intracerebral hemorrhage: evidence from the North East Melbourne Stroke Incidence Study (NEMESIS)*. *Health and quality of life outcomes*, 2010. **8**(1): p. 49.
17. National, C.G.C.A. and C.U. *Chronic, Venous Thromboembolism: Reducing the Risk of Venous Thromboembolism (Deep Vein Thrombosis and Pulmonary Embolism) in Patients Admitted to Hospital*. 2010.
18. Kolominsky-Rabas, P.L., et al., *Lifetime Cost of Ischemic Stroke in Germany: Results and National Projections From a Population-Based Stroke Registry*. *The Erlangen Stroke Project*, 2006. **37**(5): p. 1179-1183.
19. Barmer GEK. Glaeske G, S.C., *Arzneimittelreport 2014*. 2014.
20. Bundesvereinigung, K. *Einheitlichen Bewertungsmaßstab (EBM) 2018*. 2018 [cited 2018 29.May 2018]; Available from: <http://www.kbv.de/tools/ebm/>.
21. 2018, G.A.A.N. *Orale Antikoagulation bei nicht-valvulärem Vorhofflimmern – NOAKs oder VKA?* 2018 [cited 2018 29. May 2018]; Available from: [https://www.kvwl.de/arzt/verordnung/arzneimittel/info/agavm/antagonisten\\_vka\\_atikoagulation\\_noak.pdf](https://www.kvwl.de/arzt/verordnung/arzneimittel/info/agavm/antagonisten_vka_atikoagulation_noak.pdf).
22. Levin, L.-Å., et al., *A cost-effectiveness analysis of screening for silent atrial fibrillation after ischaemic stroke*. *Ep Europace*, 2014. **17**(2): p. 207-214.

## Schnabel et al. – First detected AF

23. Alonso, A., et al., *Simple risk model predicts incidence of atrial fibrillation in a racially and geographically diverse population: the CHARGE-AF consortium*. Journal of the American Heart Association, 2013. **2**(2): p. e000102.
24. Lip, G.Y., et al., *Identifying patients at high risk for stroke despite anticoagulation: a comparison of contemporary stroke risk stratification schemes in an anticoagulated atrial fibrillation cohort*. Stroke, 2010. **41**(12): p. 2731-8.
